# Supplementary material for: Sample Size Requirements of a Pharmaceutical Material Library: A Case in Predicting Direct Compression Tablet Tensile Strength by Latent Variable Modeling
Source: MDPI journal article supplement (doi:10.3390/pharmaceutics16020242), 2024-02-07
Supplement: s1 [file s1]

**Supplementary Materials: Figure S1, Figure S2, Figure S3, Figure S4, Figure S5, Figure S6 and Figure S7, Table S1, Table S3 and Table S4.**

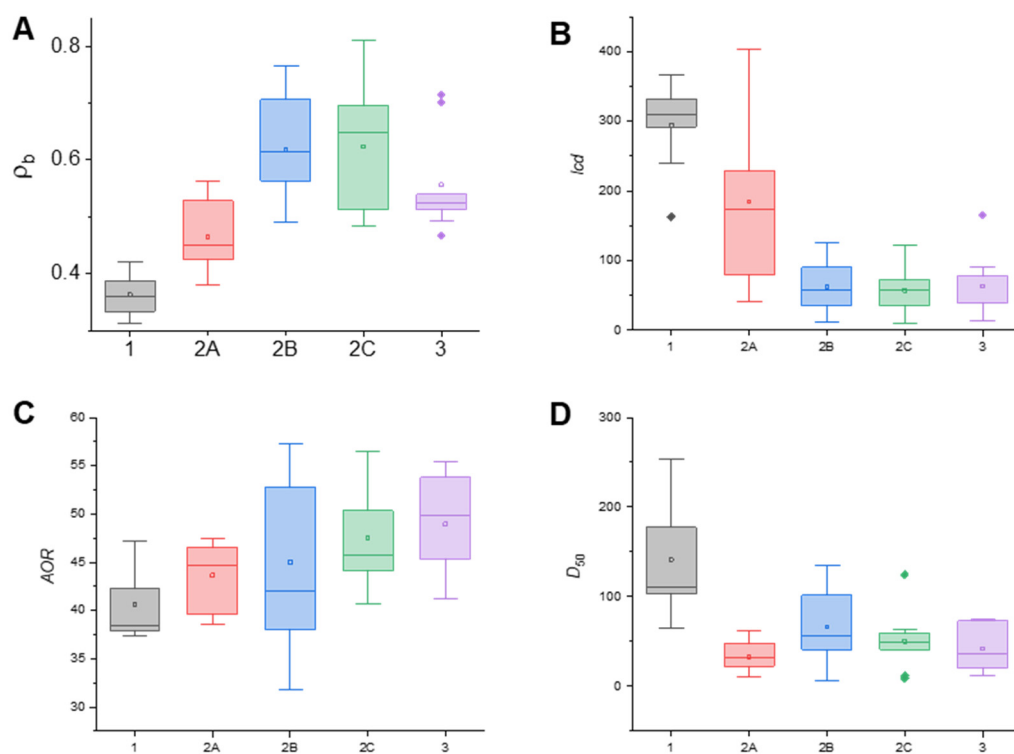

**Figure S1.** The boxplots of 45 materials related to 4 properties (A) bulk density; (B)  $I_{cd}$ ; (C) AOR; (D)  $D_{50}$ .

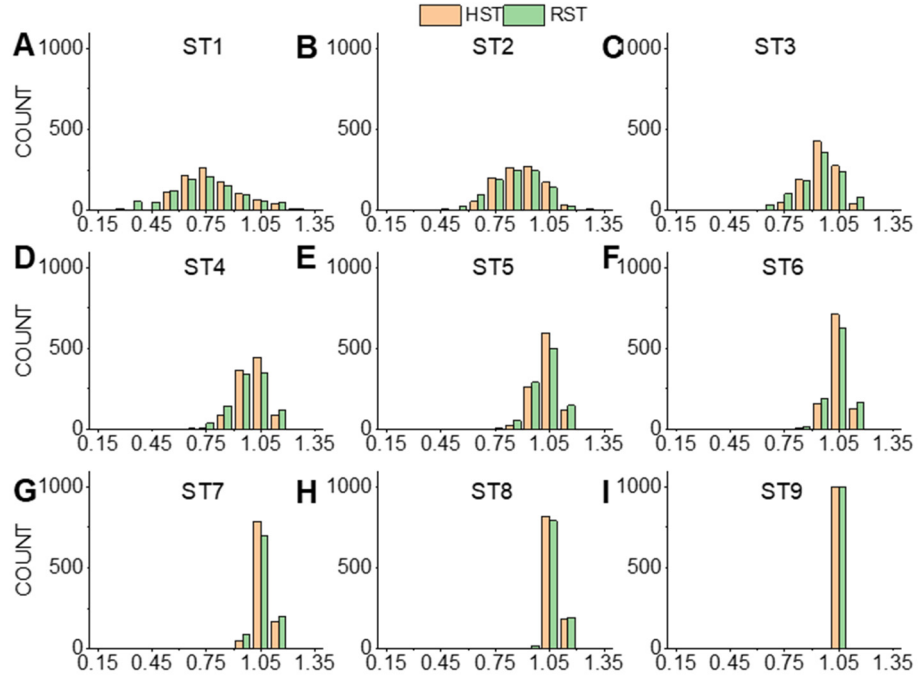

**Figure S2.** The histograms of root mean square error from cross-validation. Each subgraph (A)~(I) represents a group of few-shot sampling dataset  $i$  models (sample size= $5 \times i$ ,  $i = 1 \sim 9$ ). The orange color represents hierarchical sampling models and the green color represents random sampling models.

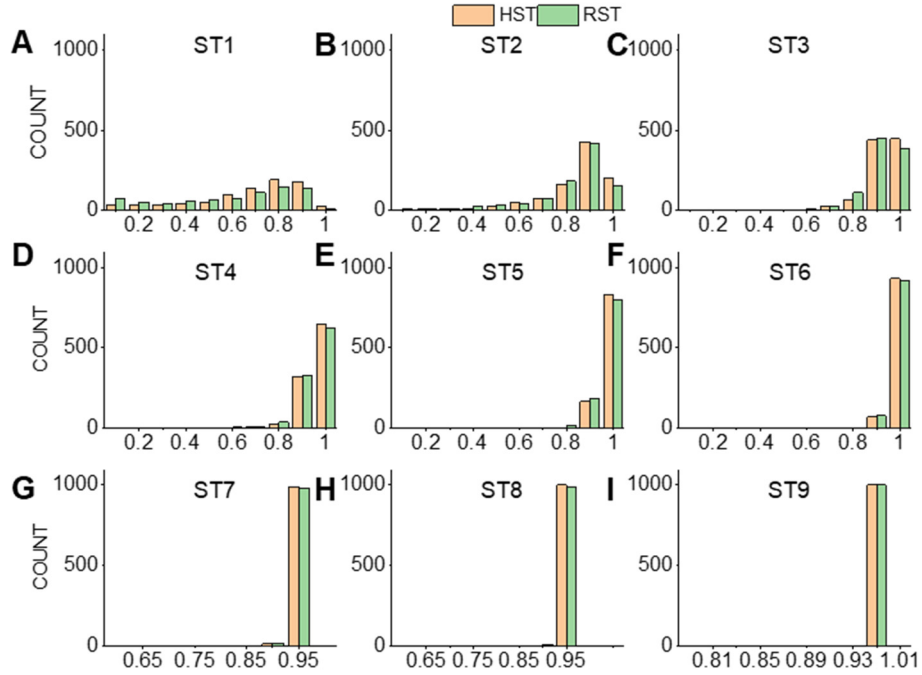

**Figure S3.** The histograms of correlation coefficient from external validation. Each subgraph (A)~(I) represents a group of few-shot sampling dataset  $i$  models (sample size= $5 \times i$ ,  $i = 1 \sim 9$ ). The orange

color represents hierarchical sampling models and the green color represents random sampling models.

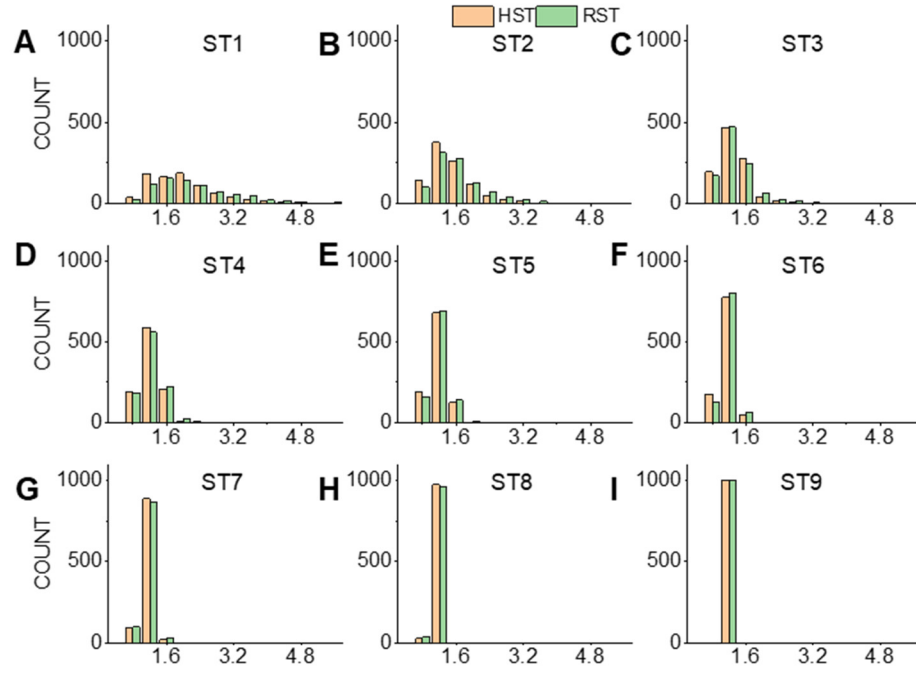

**Figure S4.** The histograms of root mean square error from external validation. Each subgraph (A)~(I) represents a group of few-shot sampling dataset  $i$  models (sample size= $5 \times i$ ,  $i=1 \sim 9$ ). The orange color represents hierarchical sampling models and the green color represents random sampling models.

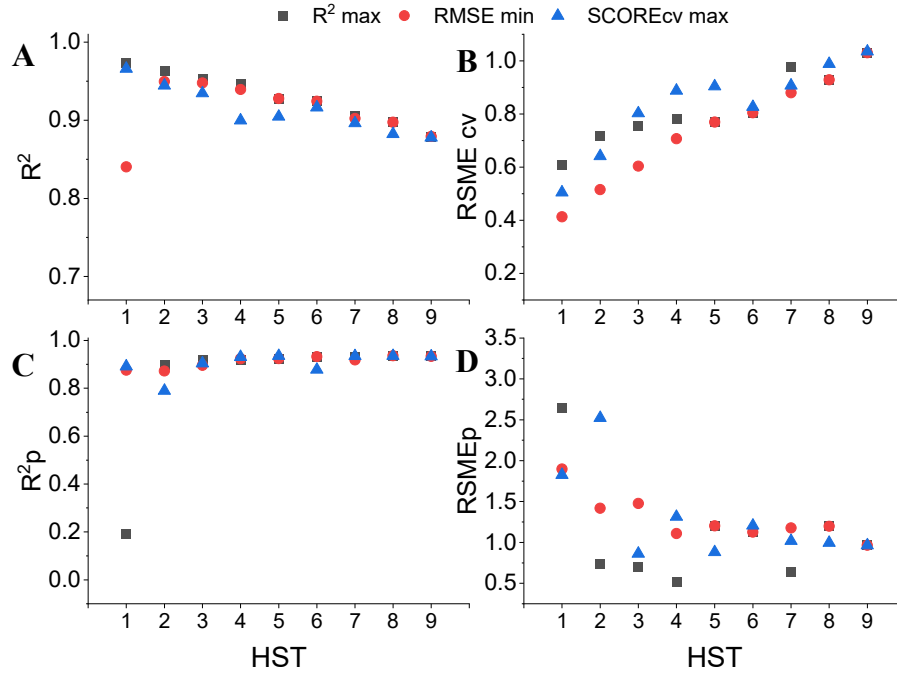

**Figure S5.** The scatter plots of prediction performance in hierarchical sampling models screened by 3 evaluation indices. Subgraph (A)~(D) represent 4 prediction performance indicators of models,  $R^2$ ,  $RMSE$ ,  $R^2p$  and  $RMSEP$ , respectively. Black color represents  $R^2$ -max which is one of screening indices, red color represents  $RMSE$ -min, and blue color represents  $SCOREcv$ -max.

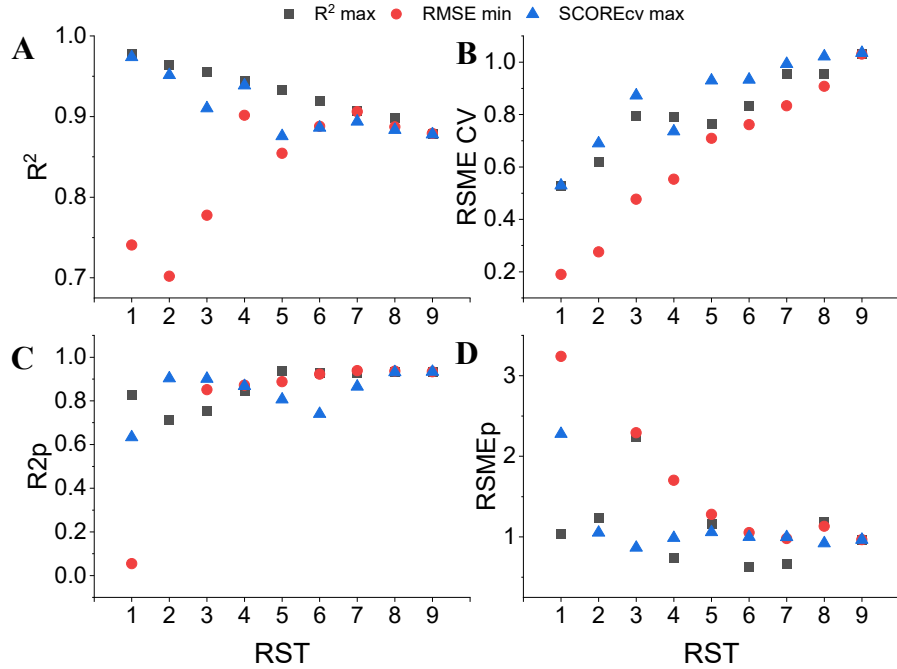

**Figure S6.** The scatter plots of prediction performance in random sampling models screened by 3 evaluation indices. Subgraph (A)~(D) represent 4 prediction performance indicators of models,  $R^2$ ,  $RMSE$ ,  $R^2p$  and  $RMSEP$ , respectively. Black color represents  $R^2$ -max which is one of screening indices, red color represents  $RMSE$ -min, and blue color represents  $SCOREcv$ -max.

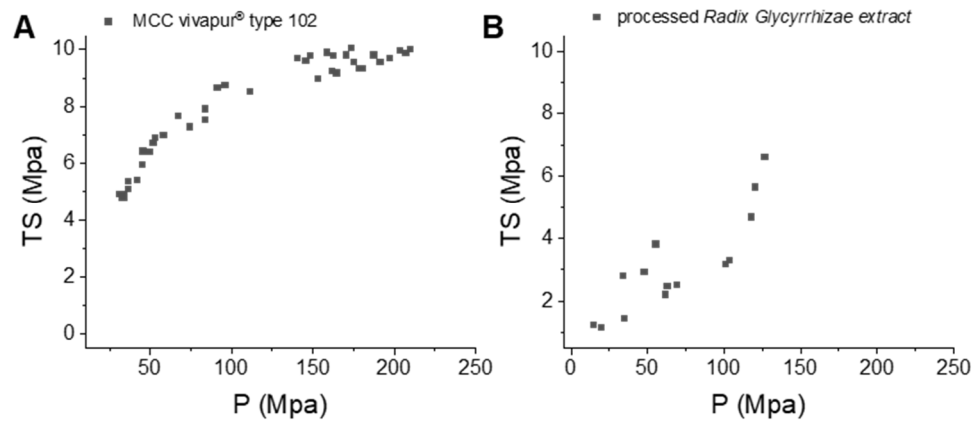

**Figure S7.** The compression curves of high frequency materials under the maximum *SCORE* value (A) MCC vivapur® type 102 in hierarchical sampling models; (B) processed *Radix Glycyrrhizae* extract in random sampling models.

## Supplementary Materials: Table S1, Table S3, Table S4

**Table S1.** The information of material libraries information reported in the 2018~2023.

| No. | Sample size | Material attributes | Application area                                                                  | Sample name                                                                                                                        | Material attribute test                                                                                                                                                                     | Years | References |
|-----|-------------|---------------------|-----------------------------------------------------------------------------------|------------------------------------------------------------------------------------------------------------------------------------|---------------------------------------------------------------------------------------------------------------------------------------------------------------------------------------------|-------|------------|
| 1   | 20          | 30                  | Find surrogate materials for pharmaceutical process development                   | API, Cellulose, Croscarmellose Sodium, Crospovidone, Magnesium Stearate, Starch, etc.                                              | Density, particle size, flowability (Cohesion, Unconfined Yield Stress, Major Principal Stress, Main Consolidation Stress, and Flow Function Coefficient, Angle of Internal Friction), etc. | 2018  | [1]        |
| 2   | 55          | Over 100            | Be used as the basis to build predictive models for <i>in silico</i> process.     | API, Cellulose, Lactose, Mannitol, Starch, Copovidone, HPMC, Co-processed excipients, Magnesium Stearate, Talc, Crospovidone, etc. | Density, compressibility, moisture sorption, permeability and fluidization, powder flow, wall fraction, particle size and shape, surface area, porosity, electrostatic charge, etc.         | 2018  | [8]        |
| 3   | 41          | 8                   | Develop a DC decision-making tool to accelerate materials screening.              | API, Lactose, Microcrystalline cellulose, Hydroxypropyl methylcellulose, Magnesium stearate.                                       | Particle size distribution (D10, D50, D90), specific surface area (SSA), bulk density (BD), tapped density (TBD), Carr's index (CARR) and Hausner ratio (HR), etc.                          | 2019  | [9]        |
| 4   | 15          | 25                  | Predict the volumetric and gravimetric feeding behavior of a low feed rate feeder | API, Cellulose, Lactose, Dibasic calcium phosphate, Crospovidone, Pre-gelatinized starch, Magnesium stearate.                      | Density, particle size, flowability, charge density.                                                                                                                                        | 2019  | [10]       |

|   |     |    |                                                                                                                            |                                                                                                                                                                        |                                                                                                                                                                                       |      |      |
|---|-----|----|----------------------------------------------------------------------------------------------------------------------------|------------------------------------------------------------------------------------------------------------------------------------------------------------------------|---------------------------------------------------------------------------------------------------------------------------------------------------------------------------------------|------|------|
| 5 | 130 | 18 | Develop a compression behavior classification system for DC.                                                               | NPP, Cellulose, Lactose, Mannitol, Starch, Copovidone, HPMC, Magnesium Stearate, Talc, Carboxy methyl starch sodium, Polyvinylpyrrolidone, Dextrin, etc.               | Density, compressibility, flowability, moisture sorption, particle size, compression descriptor, etc.                                                                                 | 2019 | [4]  |
| 6 | 20  | 32 | Study the effect of tracer material properties on the residence time distribution of continuous powder blending operations | API, Cellulose, Croscarmellose Sodium, Crospovidone, Magnesium Stearate, Starch, etc.                                                                                  | Density, particle size, flowability (Cohesion, Unconfined Yield Stress, Major Principal Stress, Main Consolidation Stress, and Flow Function Coefficient, Angle of Internal Friction) | 2019 | [11] |
| 7 | 20  | 44 | Evaluate material performance on a loss-in-weight feeder.                                                                  | API, Cellulose, Croscarmellose Sodium, Crospovidone, povidone, sodium stearyl fumarate, magnesium stearate, calcium phosphate anhydrous, hypromellose, etc.            | Particle size distribution, flowability, compressibility, permeability, etc.                                                                                                          | 2019 | [12] |
| 8 | 111 | 22 | Develop a compression behavior classification system for roll compaction.                                                  | NPP, Cellulose, Lactose, Mannitol, Starch, Copovidone, HPMC, Magnesium Stearate, Talc, Carboxy methyl starch sodium, Polyvinylpyrrolidone, croscarmellose sodium, etc. | Density, particle size, flowability, compressibility, stability and texture, etc.                                                                                                     | 2019 | [3]  |
| 9 | 12  | 18 | Analyze the effect of the material attributes on the dissolution profile of the matrix tablet.                             | NPP, HPMC                                                                                                                                                              | Density, compressibility, flowability, moisture sorption, particle size, etc.                                                                                                         | 2019 | [13] |

|    |    |    |                                                                                          |                                                                                                      |                                                                                                                                                                                                       |      |      |
|----|----|----|------------------------------------------------------------------------------------------|------------------------------------------------------------------------------------------------------|-------------------------------------------------------------------------------------------------------------------------------------------------------------------------------------------------------|------|------|
| 10 | 10 | 30 | Analyze the impact of material attributes on the performance of an auger dosing process. | API, cellulose, lactose, starch, ascorbic acid, magnesium stearate, etc.                             | Density, particle size, moisture, compressibility, flowability, shear properties, dynamic properties, etc.                                                                                            | 2020 | [7]  |
| 11 | 13 | 44 | Predict the feeding performance based on material properties.                            | API, Cellulose, Lactose, starch, etc.                                                                | Density, compressibility, moisture sorption, permeability and fluidization, powder flow, wall fraction, particle size and shape, surface area, porosity, electrostatic charge.                        | 2021 | [14] |
| 12 | 81 | 28 | Develop machine learning models between material properties and DC tablet properties.    | API, cellulose, magnesium stearate, etc.                                                             | Density, compressibility, moisture sorption, in-die elastic recovery, molecular weight, the partition coefficient, solubility, hygroscopicity, WAR, and surface free energy, etc.                     | 2021 | [15] |
| 13 | 27 | 48 | Develop a TPLS model for twin-screw wet granulation process and formulation development  | API, cellulose, lactose, starch, mannitol, hydroxypropyl methylcellulose, polyvinylpyrrolidone, etc. | Density, particle size, flowability, powder elasticity and plasticity, powder rheology, charge density, specific surface area, solubility, dissolution rate, sorption properties, contact angle, etc. | 2021 | [16] |
| 14 | 56 | 18 | Develop a formulation-process-quality model for high shear wet granulation               | API, cellulose, lactose, starch, PVP, etc.                                                           | Density, particle size, flowability, moisture, etc.                                                                                                                                                   | 2021 | [17] |



|    |    |    |                                                                                                   |                                                                                                                                                   |                                                                                                                                                                                |      |      |
|----|----|----|---------------------------------------------------------------------------------------------------|---------------------------------------------------------------------------------------------------------------------------------------------------|--------------------------------------------------------------------------------------------------------------------------------------------------------------------------------|------|------|
| 15 | 12 | 44 | Analyze the impact of material attributes on gravimetric feeding process.                         | API, cellulose, lactose, mannitol, MgSt, etc.                                                                                                     | Density, compressibility, moisture sorption, permeability and fluidization, powder flow, wall fraction, particle size and shape, surface area, porosity, electrostatic charge. | 2022 | [18] |
| 16 | 14 | 55 | Develop a TPLS model for DC process and formulation                                               | API, cellulose, lactose, MgSt, mannitol, croscarmellose, dibasic calcium phosphate, colloidal silicon dioxide, etc.                               | Density, compressibility, moisture sorption, powder rheometer, powder flow, wall fraction, particle size and shape, surface area, porosity, static image, charge density, etc. | 2022 | [19] |
| 17 | 32 | 19 | Develop a PCA model to recognize the highest amount of variability in physical powder properties. | API, cellulose, lactose, MgSt, mannitol, croscarmellose, dibasic calcium phosphate, colloidal silicon dioxide, Co-processed excipients, PVP, etc. | Density, compressibility, moisture sorption, powder rheometer, powder flow, wall fraction, particle size and shape, surface area, porosity, static image, charge density, etc. | 2022 | [20] |
| 18 | 30 | 19 | Develop a tabletability change classification system for high shear wet granulation.              | NPP, cellulose, lactose, starch, dextrin, mannitol, calcium phosphate, dibasic calcium phosphate, dibasic calcium phosphate anhydrous, etc.       | Density, compressibility, flowability, moisture sorption, particle size, compression descriptor, tabletability change index, etc.                                              | 2022 | [21] |
| 19 | 15 | 14 | Develop a tabletability change classification system under roll compaction granulation.           | Cellulose, lactose, MgSt, mannitol, HPMC, Polyvinyl alcohol, Poly(ethylene)oxide, Maltodextrin, etc.                                              | Density, particle size, flowability, compressibility, etc.                                                                                                                     | 2023 | [22] |

|    |    |    |                                                                                                 |                                                                                                                                                                                                         |                                                                                                                                   |      |      |
|----|----|----|-------------------------------------------------------------------------------------------------|---------------------------------------------------------------------------------------------------------------------------------------------------------------------------------------------------------|-----------------------------------------------------------------------------------------------------------------------------------|------|------|
| 20 | 31 | 18 | Analyze the impact of material attributes on direct compressible extended release formulations. | NPP, cellulose, lactose, hydroxypropyl methylcellulose (HPMC), low-substituted hydroxypropyl cellulose (L-HPC), croscarmellose sodium (CCNa), corn starch, D-sorbitol, DCP and sodium bicarbonate, etc. | Density, compressibility, flowability, moisture sorption, particle size, compression descriptor, tabletability change index, etc. | 2023 | [23] |
|----|----|----|-------------------------------------------------------------------------------------------------|---------------------------------------------------------------------------------------------------------------------------------------------------------------------------------------------------------|-----------------------------------------------------------------------------------------------------------------------------------|------|------|

**Table S3.** The maximum and minimum of  $R^2$  values of models during cross validation.

|      | Max  | Min  |      | Max  | Min  |
|------|------|------|------|------|------|
| HST1 | 0.97 | 0.62 | RST1 | 0.98 | 0.59 |
| HST2 | 0.96 | 0.62 | RST2 | 0.96 | 0.49 |
| HST3 | 0.95 | 0.74 | RST3 | 0.96 | 0.51 |
| HST4 | 0.95 | 0.81 | RST4 | 0.94 | 0.60 |
| HST5 | 0.93 | 0.81 | RST5 | 0.93 | 0.71 |
| HST6 | 0.92 | 0.83 | RST6 | 0.92 | 0.77 |
| HST7 | 0.91 | 0.84 | RST7 | 0.91 | 0.78 |
| HST8 | 0.90 | 0.86 | RST8 | 0.90 | 0.83 |
| HST9 | 0.88 | 0.88 | RST9 | 0.88 | 0.88 |

**Table S4.** The PLSR performance and overlapping area rate of 3 models. Materials in 3 datasets were constructed by (A) two important materials and three hierarchically sampled materials; (B) two important materials and three randomly sampled materials; (C) five randomly sampled materials without 2 important materials.

|                       | Group A   | Group B    | Group C    |
|-----------------------|-----------|------------|------------|
| $R^2$                 | 0.91~0.96 | 0.79~0.96  | 0.55~0.98  |
| $RMSE$                | 0.68~1.11 | 0.62~1.23  | 0.08~1.31  |
| $SCORE_{cv}$          | 0.28~3.25 | 0.26~7.61  | 0.21~6.51  |
| $R^2_p$               | 0.43~0.94 | 0~0.94     | 0~0.93     |
| $RMSE_p$              | 0.46~1.5  | 0.47~3.96  | 0.6~6.73   |
| $SCORE_p$             | 1.68~8.42 | -0.08~7.56 | -1.18~7.05 |
| Overlapping area rate | 18~100%   | 5~100%     | 3~100%     |
