# Supplementary material for: Sample Size Requirements of a Pharmaceutical Material Library: A Case in Predicting Direct Compression Tablet Tensile Strength by Latent Variable Modeling
Source: Pharmaceutics. 2024 Feb 7;16(2):242. doi: 10.3390/pharmaceutics16020242 (PMC10893091; doi:10.3390/pharmaceutics16020242)
Supplement: Supplementary file 1 [file pharmaceutics-16-00242-s001.zip › Supplementary materials S2.xlsx]

## Sheet: Sheet1
	Table S2. The information for 45 materials including names, abbreviations, batch numbers suppliers and physical attributes.
Material ID	Number	Name	Abbreviation	Batch number	Supplier	Material property																		Tabletability category
No.						D10	D50	D90	%pf	Iθ	span	ρb	ρt	Dt	SFp	Ie	IC	IH	AOR	t	%HR	%H	Icd
1	E1	Microcrystalline Cellulose vivapur® type200	MCC	5620030813	JRS Pharma GmbH&Co. KG	75.2967	253.633	572.867	5.66333	0.0018885	1.96167	0.413223	0.541078	1.5814	0.261302	0.571667	23.6226	1.30941	38.2347	17.0533	3.91333	4.04437	291.483	1
2	E2	Microcrystalline Cellulose PH200NF	MCC	P0200J1511	SSP, China-Germany joint venture	90.5533	238.9	530.2	3.22667	0.0024791	1.85817	0.3558	0.461679	1.601	0.222236	0.644568	22.9333	1.29759	37.4372	21.1483	3.88	4.30507	334.233	1
3	E3	Microcrystalline Cellulose OricelTM PH-102 SCG	MCC	P0102F1506	SSP, China-Germany joint venture	69.78	177.167	411.033	5.43333	0.00434519	1.926	0.3608	0.479788	1.6139	0.223558	0.687429	24.8	1.3298	37.8848	26.605	3.95167	4.05426	332.2	1
4	E4	Microcrystalline Cellulose OricelTM PH302NF	MCC	P0102D1509	SSP, China-Germany joint venture	31.5833	94.1633	189.533	18.66	0.00633587	1.677	0.333333	0.452085	1.5899	0.209657	0.788115	26.2667	1.3563	38.3756	31.2683	3.75333	4.39371	308.967	1
5	E5	Microcrystalline Cellulose OricelTM PH-112	MCC	5610237731	SSP, China-Germany joint venture	23.05	103.233	272.9	24.79	0.0040503	2.419	0.313533	0.460622	1.5761	0.19893	1.01862	31.9333	1.46917	47.129	60	4.22667	3.01138	319.967	1
6	E6	MCC PH102	MCC	NO.2565	Asahi Kasei Chemicals Corporation	35.3533	119.2	268.067	15.26	0.00581907	1.951	0.315267	0.431476	1.5952	0.197635	0.854387	26.9333	1.36862	41.5133	60	4.10667	3.26899	366.8	1
7	E23	Microcrystalline Cellulose OricelTM PH302NF	MCC	P0302F1509	SSP, China-Germany joint venture	31.8433	109.967	250.3	17.6567	0.00563933	1.98433	0.421355	0.562862	1.5939	0.264355	0.596667	25.1401	1.33584	42.2541	24.91	4.525	3.91696	293.65	1
8	E34	Ethylcellulose N-7 Pharm	EC	44156	Ashland_Aqualon, Kentucky	25.8467	110.94	284.333	20.2233	0.00436727	2.32633	0.387733	0.49092	1.1754	0.329874	0.541534	21	1.26599	37.3333	23.1017	1.11167	0.570154	238.883	1
9	E46	Hydroxypropyl methylcellulose E5LV	HPMC	3G190124L1	The Dow Chemical Company	23.4067	65.4533	162.8	37.78	0.00321558	2.131	0.3616	0.511252	1.4214	0.254397	0.809372	39.9333	1.41386	45.4363	60	3.77167	5.04405	162.917	1
10	E8	lactose Cellactose® 80	Lac	L1533	Molkerei Meggle Wasserburg GmBH & Co. KG	13.15	48.05	114.667	51.9367	0.00153095	2.11233	0.3932	0.503688	1.6071	0.244664	0.557917	21.9333	1.28105	38.5497	23.4717	4.41	2.21545	164.667	2A
11	E29	Croscarmellose sodium	CMC-Na	X5G248	Nichirin chemical industries LTD	5.322	32.4567	93.1833	67.0267	0.000736309	2.74267	0.450802	0.685007	1.5622	0.288569	0.758333	34.1849	1.51953	47.4433	60	9.48667	9.47282	214.267	2A
12	E44	Hydroxy propyl methyl cellulose E3LV	HPMC	2E150124L2	The Dow Chemical Company	22.0367	61.58	135.833	38.33	0.00260736	1.84833	0.379267	0.527247	1.3067	0.290248	0.740073	28.0667	1.39018	45.5509	60	3.38333	6.08616	228.6	2A
13	E56	Calcium carboxymethylcellulose ECG505	CMC-Ca	E4I086	Nichirin chemical industries Ltd.	15.3467	53.7967	121.567	46.36	0.00192767	1.97567	0.453863	0.661564	1.6108	0.281762	0.691667	31.3916	1.45763	44.5981	60	8.155	11.8009	174.233	2A
14	Z2	Radix Rehmanniae Recens extract	Sheng dihuang	SDH201609	Beijing Tcmages Pharmaceutical Co., Ltd.	5.564	32.0225	96.0875	69.224	0.000485047	2.843	0.561804	0.813008	1.5827	0.354966	0.549981	30.8981	1.44714	46.5549	60	4.39167	20.6089	158.25	2A
15	Z4	Herba Ecliptae extract	Mo Hanlian	MHL201609	Beijing Tcmages Pharmaceutical Co., Ltd.	3.2915	11.0775	28.7025	98.4425	0	2.292	0.425274	0.530372	1.4596	0.291363	0.465953	19.8158	1.24713	38.6032	60	7.515	39.0713	333.438	2A
16	Z6	processed Radix Glycyrrhizae extract	Zhi gancao	ZGC201609	Beijing Tcmages Pharmaceutical Co., Ltd.	3.4868	13.454	55.164	89.318	4.17844e-05	3.8384	0.442481	0.560752	1.2546	0.352687	0.476664	21.0915	1.26729	39.6197	60	5.77333	21.0673	198.633	2A
17	Z8	Rhizoma Belamcandae extract	She gan	SG201609	Beijing Tcmages Pharmaceutical Co., Ltd.	5.18075	22.59	63.13	84.7533	5.16417e-05	2.569	0.552089	0.80891	1.5171	0.363911	0.575072	31.7491	1.46518	44.7158	60	7.53167	25.1902	276.143	2A
18	Z17	Radix Angelicae Sinensis extract	Dang gui	DG21609	Beijing Tcmages Pharmaceutical Co., Ltd.	5.432	23.4067	65.26	83.85	4.5605e-05	2.55533	0.527708	0.767273	1.4403	0.366388	0.59167	31.2229	1.45397	47.4415	60	7.5	23.649	403.8	2A
19	E9	lactose Tablettose® 80	Lac	L1543	Molkerei Meggle Wasserburg GmBH & Co. KG	9.749	57.0733	143.167	45.5633	0.00248164	2.268	0.588249	0.764367	1.5687	0.374991	0.391667	23.038	1.29941	38.046	16.63	3.53833	0.0531013	57.4167	2B
20	E10	lactose Flowlac® 100	Lac	L1517	Molkerei Meggle Wasserburg GmBH & Co. KG	15.8	62.1867	132.767	38.61	0.00261907	1.88067	0.617931	0.734413	1.5324	0.403244	0.256667	15.8592	1.18851	31.8062	11.4217	4.225	0	126.2	2B
21	E12	lactose Pharmatose® 110M	Lac	1009CON	DFE Pharma	9.96667	41.09	101.6	59.44	0.0010049	2.237	0.615398	0.743518	1.5651	0.393201	0.28	17.2305	1.20819	37.1087	12.67	3.98333	2.15234	66	2B
22	E13	lactose anhydrous 21 AN	Lac	1007NX8	DFE Pharma	21.6567	134.833	334.133	18.2633	0.00405243	2.31467	0.706781	0.939043	1.5654	0.451502	0.35	24.7316	1.32868	49.8144	60	0.0583333	0.127213	96.6	2B
23	E17	lactose Granulac® 200	Lac	L1535	Molkerei Meggle Wasserburg GmBH & Co. KG	4.89667	38.4333	108.6	59.39	0.00123783	2.69867	0.495062	0.864589	1.5531	0.318757	0.863333	42.7391	1.74643	57.2753	60	4.515	0.0946725	23.4833	2B
24	E18	lactose Spherolac® 100	Lac	L1413	Molkerei Meggle Wasserburg GmBH & Co. KG	32.5833	108.633	218.4	15.05	0.00746152	1.71067	0.765346	0.911897	1.5371	0.497915	0.21	16.0684	1.19153	42.0154	17.9433	3.86333	0.0978308	47.1667	2B
25	E19	lactose Granulac® 70	Lac	L1533	Molkerei Meggle Wasserburg GmBH & Co. KG	29.8733	101.367	203	17.14	0.00700314	1.70667	0.717736	0.911897	1.5431	0.465126	0.296667	21.2905	1.27054	39.0991	60	3.15	0.0993559	35.5	2B
26	E31	Croscarmellose sodium	CMC-Na	10082Fo	DFE Pharma	16.38	46.7167	107.8	53.6233	0.00126499	1.95667	0.491415	0.7344	1.589	0.309261	0.673333	33.0862	1.49449	52.756	60	10.1667	6.32655	90.6	2B
27	E57	Calcium phosphate dehydrate	/	1286C350	Avantor Performance Material Strading (Shanghai) Co.Ltd.	1.52167	6.89967	22.5667	100	0	3.18833	0.563414	1.06586	2.4017	0.23459	0.836667	47.1364	1.89177	57.0697	60	3.54333	0.031618	12.2667	2B
28	E11	lactose anhydrous Duralac® H	Lac	LC042-5-805	Molkerei Meggle Wasserburg GmBH & Co. KG	19.3933	124.333	307.367	19.01	0.00436606	2.315	0.674971	0.955462	1.5695	0.430055	0.435	29.3532	1.41567	50.3494	60	0.283333	0.0942734	72.3667	2C
29	E26	lactose Pharmatose® 200M	Lac	10095MW	DFE Pharma	6.24833	46.5567	116.033	52.95	0.00158739	2.359	0.482788	0.874695	1.5661	0.308274	0.928333	44.8066	1.8119	56.4231	60	3.72667	0.027899	50.4833	2C
30	E60	Pregelatinized starch	/	NO60820327	Asahi Kasei Chemicals Corporation	17.3467	58.9667	121.867	40.8667	0.00214447	1.77367	0.49959	0.753793	1.5008	0.332882	0.675	33.7213	1.50884	44.097	60	8.24	21.7297	71.6167	2C
31	E61	Dextrin	/	170307	Beijing Biotopped Technology Co., Ltd.	6.83933	11.9033	16.9833	100	0	0.852	0.512389	0.724638	1.5332	0.334196	0.571667	29.2903	1.41425	45.7569	60	6.87833	5.95401	57.3667	2C
32	E64	Sodium bicarbonate	NaHCO3	A038821	Acros Organics Co., Ltd.	17.365	62.85	122.4	36.79	0.00236475	1.72167	0.767273	0.98201	2.2303	0.344023	0.285	21.8663	1.27988	40.7237	10.705	17.965	2.99482	15.1333	2C
33	E74	Calcium phosphate dibasic	CaHPO₄	A0345625	Acros Organics Co., Ltd.	2.632	8.81833	18.9733	100	0	1.85133	0.809748	1.22459	2.8615	0.28298	0.418333	33.8728	1.51232	41.7004	60	0.353333	0.392671	9.68333	2C
34	Z3	Radix Scutellariae extract	Huang qin	HQ201609	Beijing Tcmages Pharmaceutical Co., Ltd.	5.258	50.04	132.633	54.3625	0.00131063	2.546	0.696074	1.01182	1.5511	0.448762	0.448309	31.2056	1.45361	48.2822	60	3.24667	20.1	41.14	2C
35	Z9	Radix Glycyrrhizae extract	Sheng gancao	SGC201609	Beijing Tcmages Pharmaceutical Co., Ltd.	4.75433	41.0167	109.967	60.1575	0.0010245	2.566	0.648652	0.970904	1.4847	0.436891	0.51169	33.1909	1.4968	45.3688	60	4.53833	21.1841	76.1625	2C
36	Z13	Rhizoma Ligustici extract	Chuan xiong	CX201609	Beijing Tcmages Pharmaceutical Co., Ltd.	7.52867	48.5433	127.8	54.6133	0.00128362	2.47807	0.520865	0.881109	1.5421	0.337763	0.784949	40.8853	1.69162	55.2498	60	5.44833	15.6786	35.475	2C
37	E15	Carboxy methyl starch sodium	CMS-Na	C10072096	Shanghai Macklin Biochemical Co.,Ltd.	8.903	19.9467	68.0167	83.1333	0.00025863	2.96333	0.539098	0.807544	1.5956	0.337865	0.616667	33.2424	1.49798	47.5781	60	9.88333	10.859	39.3833	3
38	E16	Carboxy methyl starch sodium	CMS-Na	C10051641	Shanghai Macklin Biochemical Co.,Ltd.	8.905	18.36	65.5533	84.2433	0.000220986	2.92533	0.519319	0.856597	1.5913	0.326349	0.758333	39.3611	1.64942	50.3055	60	10.31	11.3353	39.1333	3
39	E30	Croscarmellose sodium Vivasol®	CMC-Na	3201061016	JRS Pharma GmbH&Co. KG	11.33	35.6467	84.44	68.1267	0.000490956	2.04333	0.534295	0.797884	1.5718	0.339926	0.618333	33.0358	1.49335	43.3341	60	9.43	9.81715	65.3833	3
40	E32	Corn starch	/	MKBW7231V	Merck KGaA, Darmstadt	7.23833	12.5733	18.31	100	0	0.879333	0.512639	0.814225	1.5447	0.33187	0.723333	37.0462	1.5887	53.9333	60	9.29333	4.45983	14.2833	3
41	Z132	Radix Paeoniae Rubra extract	Chi shao	CS20180704	Beijing Tcmages Pharmaceutical Co., Ltd.	5.243	36.05	149.7	56.7167	0.00200491	4.12933	0.46729	0.702584	1.5282	0.305778	0.716682	33.4898	1.50353	55.411	60	7.5	7.37777	75.6417	3
42	Z135	Moutan Cortex extract	Mu danpi	MDP20180704	Beijing Tcmages Pharmaceutical Co., Ltd.	5.20467	34.57	177.067	55.21	0.00213262	5.06833	0.493432	0.753778	1.5315	0.322189	0.699973	34.5389	1.52762	53.8129	60	9.73	8.07774	37.93	3
43	Z146	Coptidis Rhizoma extract	Huang lian	HL20180704	Beijing Tcmages Pharmaceutical Co., Ltd.	8.24467	72.7433	193.067	37.8533	0.00363512	2.54067	0.524488	0.757576	1.4609	0.359017	0.58662	30.7675	1.44441	49.8522	60	8.41	5.80839	39.235	3
44	H6	Radix Ploygoni Multiflori semi-extract	He shouwu	ZHSWB20190124	Beijing Tcmages Pharmaceutical Co., Ltd.	11.5767	74.8567	182.9	34.3233	0.00383292	2.28867	0.714286	0.980392	1.5722	0.454322	0.38	27.1429	1.37255	41.2194	60	8.39333	10.6668	165.025	3
45	H16	Radix Ploygoni Multiflori blend	He shouwu	ZHSWH20190124	Beijing Tcmages Pharmaceutical Co., Ltd.	10.4367	74.0933	184	35.05	0.00376843	2.342	0.700965	1	1.5663	0.447529	0.426605	29.9035	1.4266	45.2779	60	8.23333	10.7282	89.955	3
